# Supplementary material for: Cyanovirin-N binding to Manα1–2Man functionalized dendrimers
Source: Royal Society of Chemistry journal article supplement (doi:10.1039/b417789d), 2005-01-01

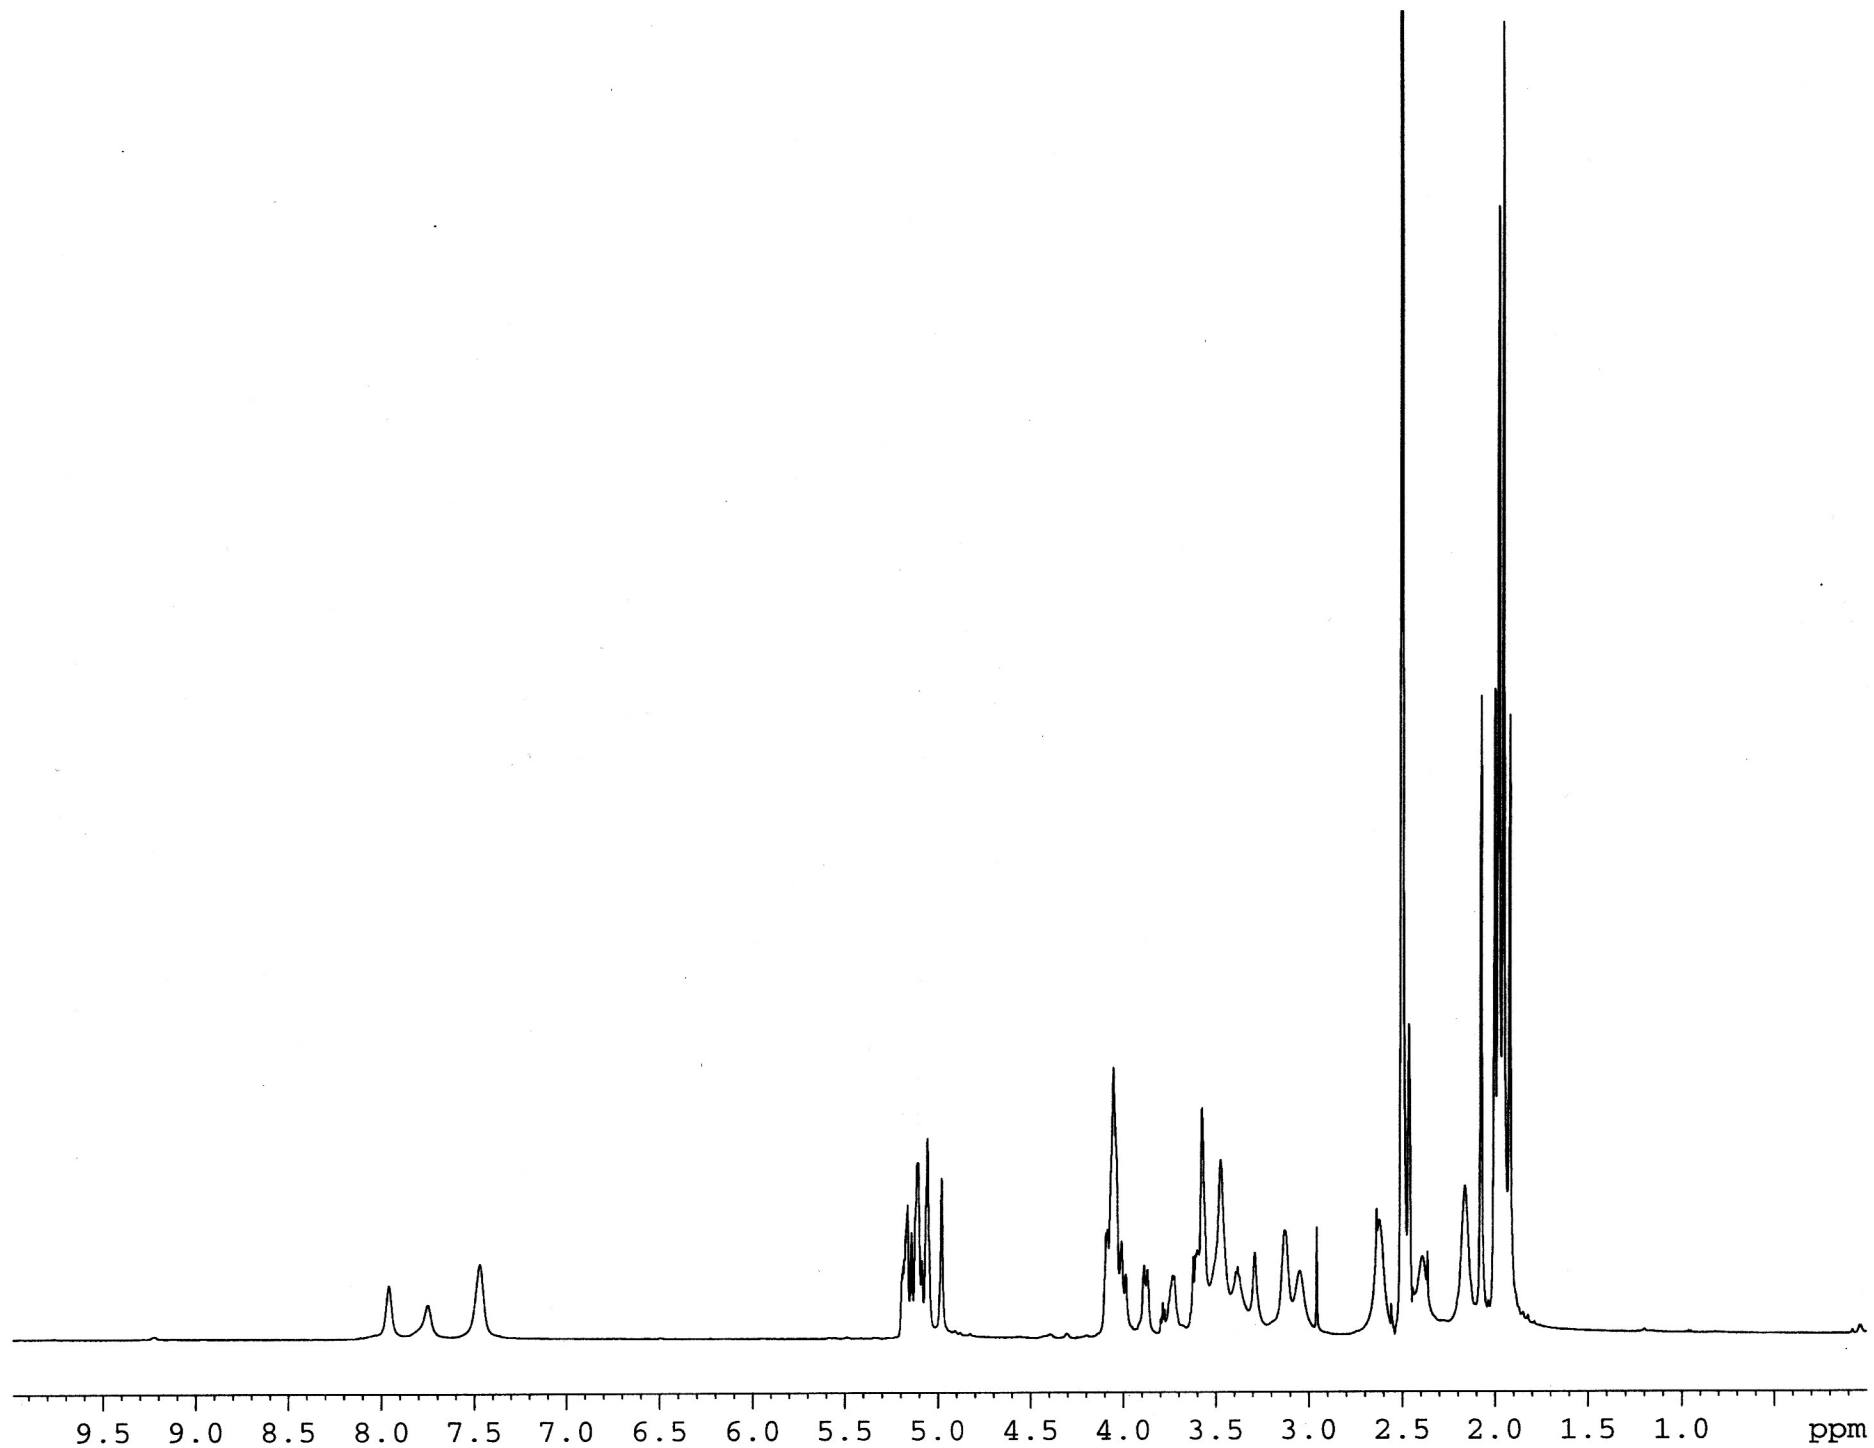

Figure S1. <sup>1</sup>H NMR spectrum (500 MHz, d<sub>6</sub>-DMSO) of 7.

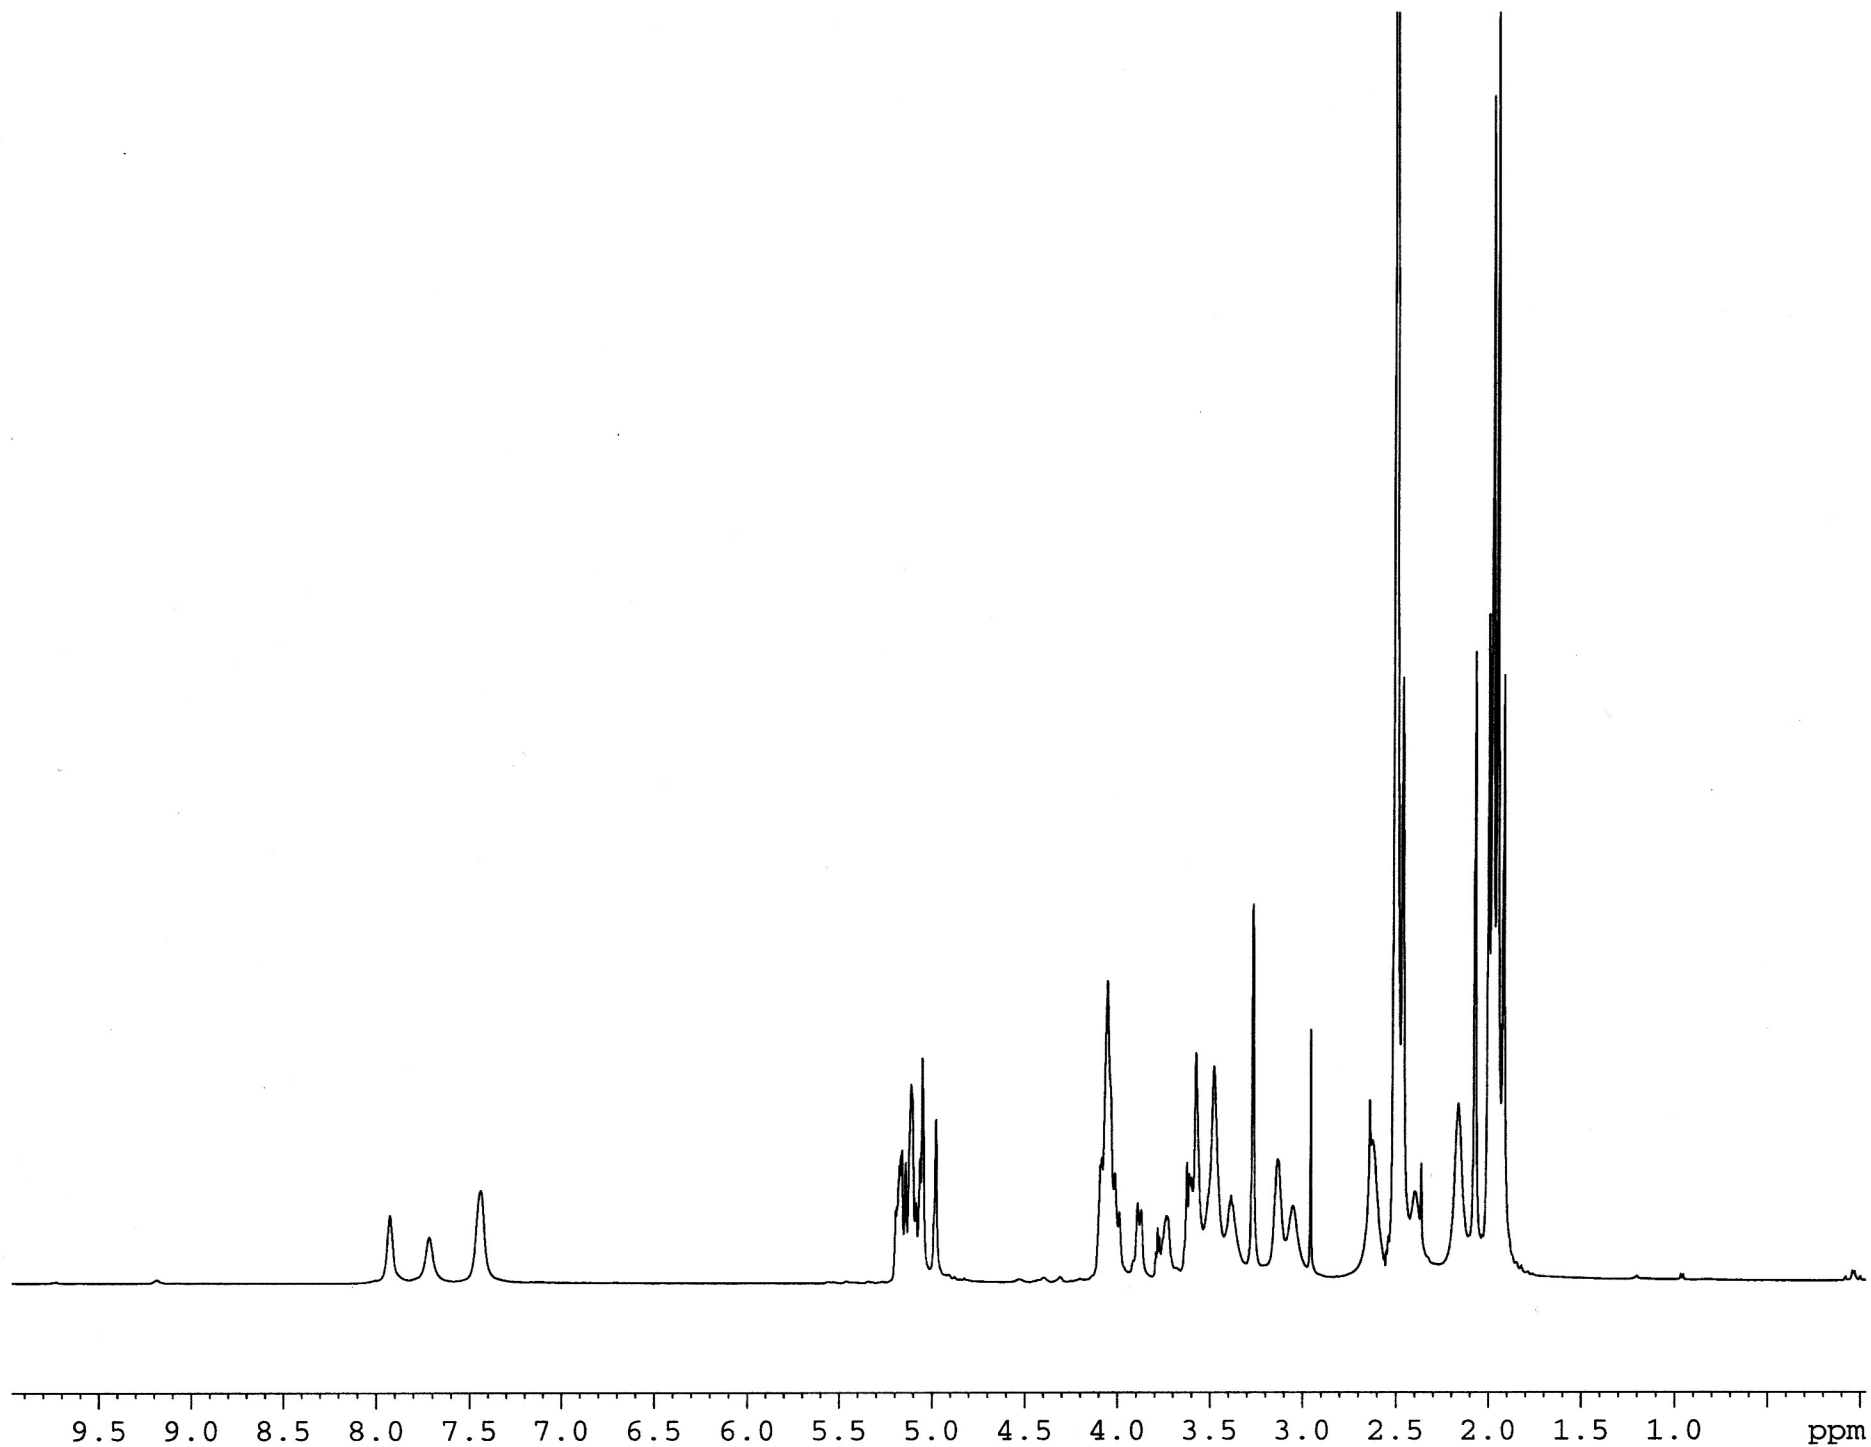

Figure S2. <sup>1</sup>H NMR spectrum (500 MHz, d<sub>6</sub>-DMSO) of 8.

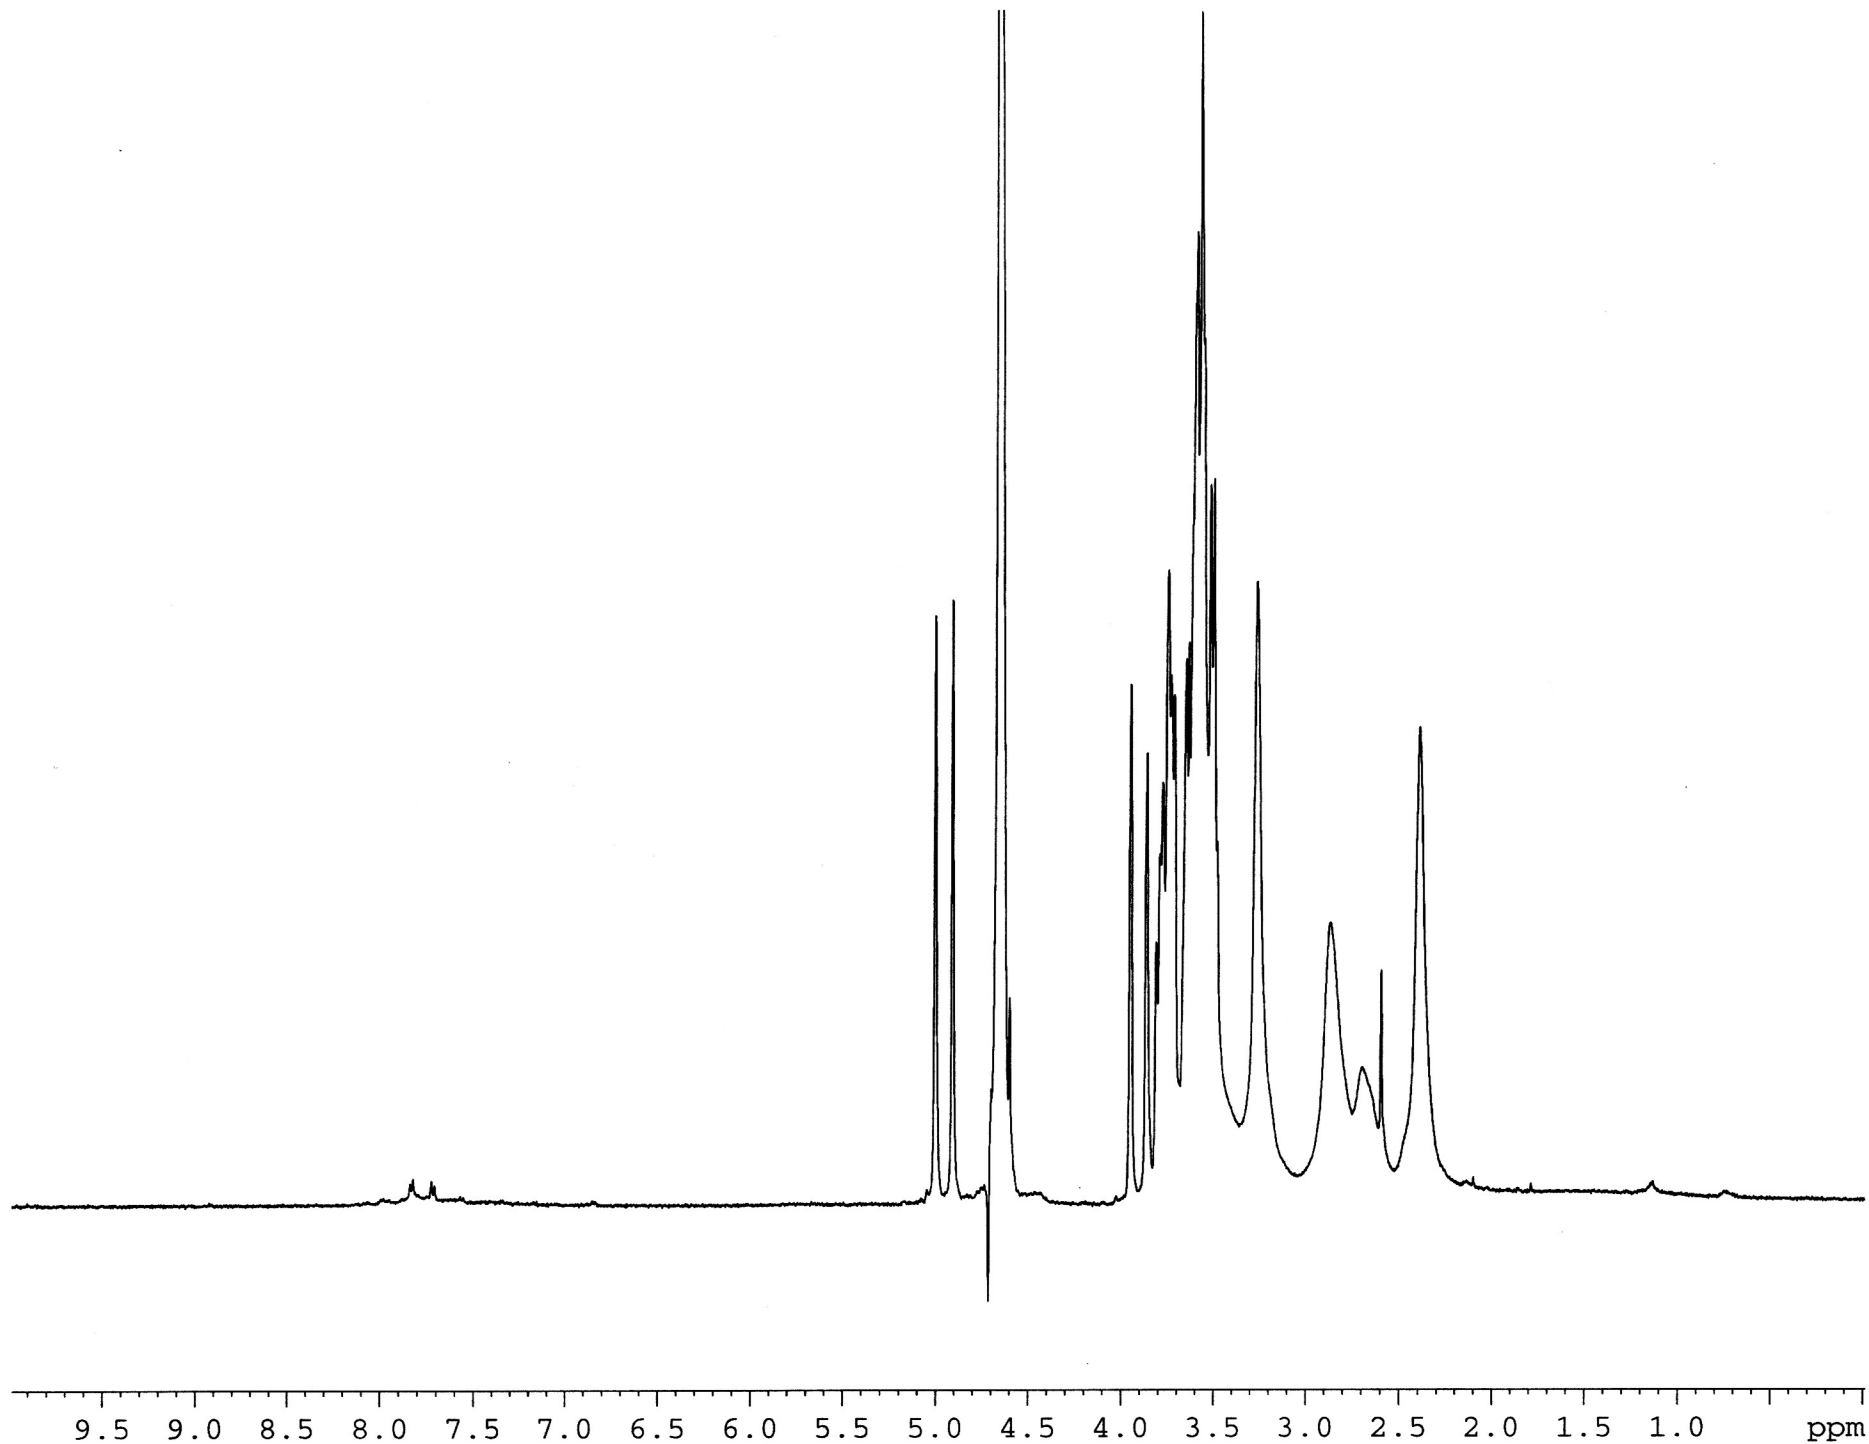

Figure S3. <sup>1</sup>H NMR spectrum (500 MHz, d<sub>6</sub>-DMSO) of 9.

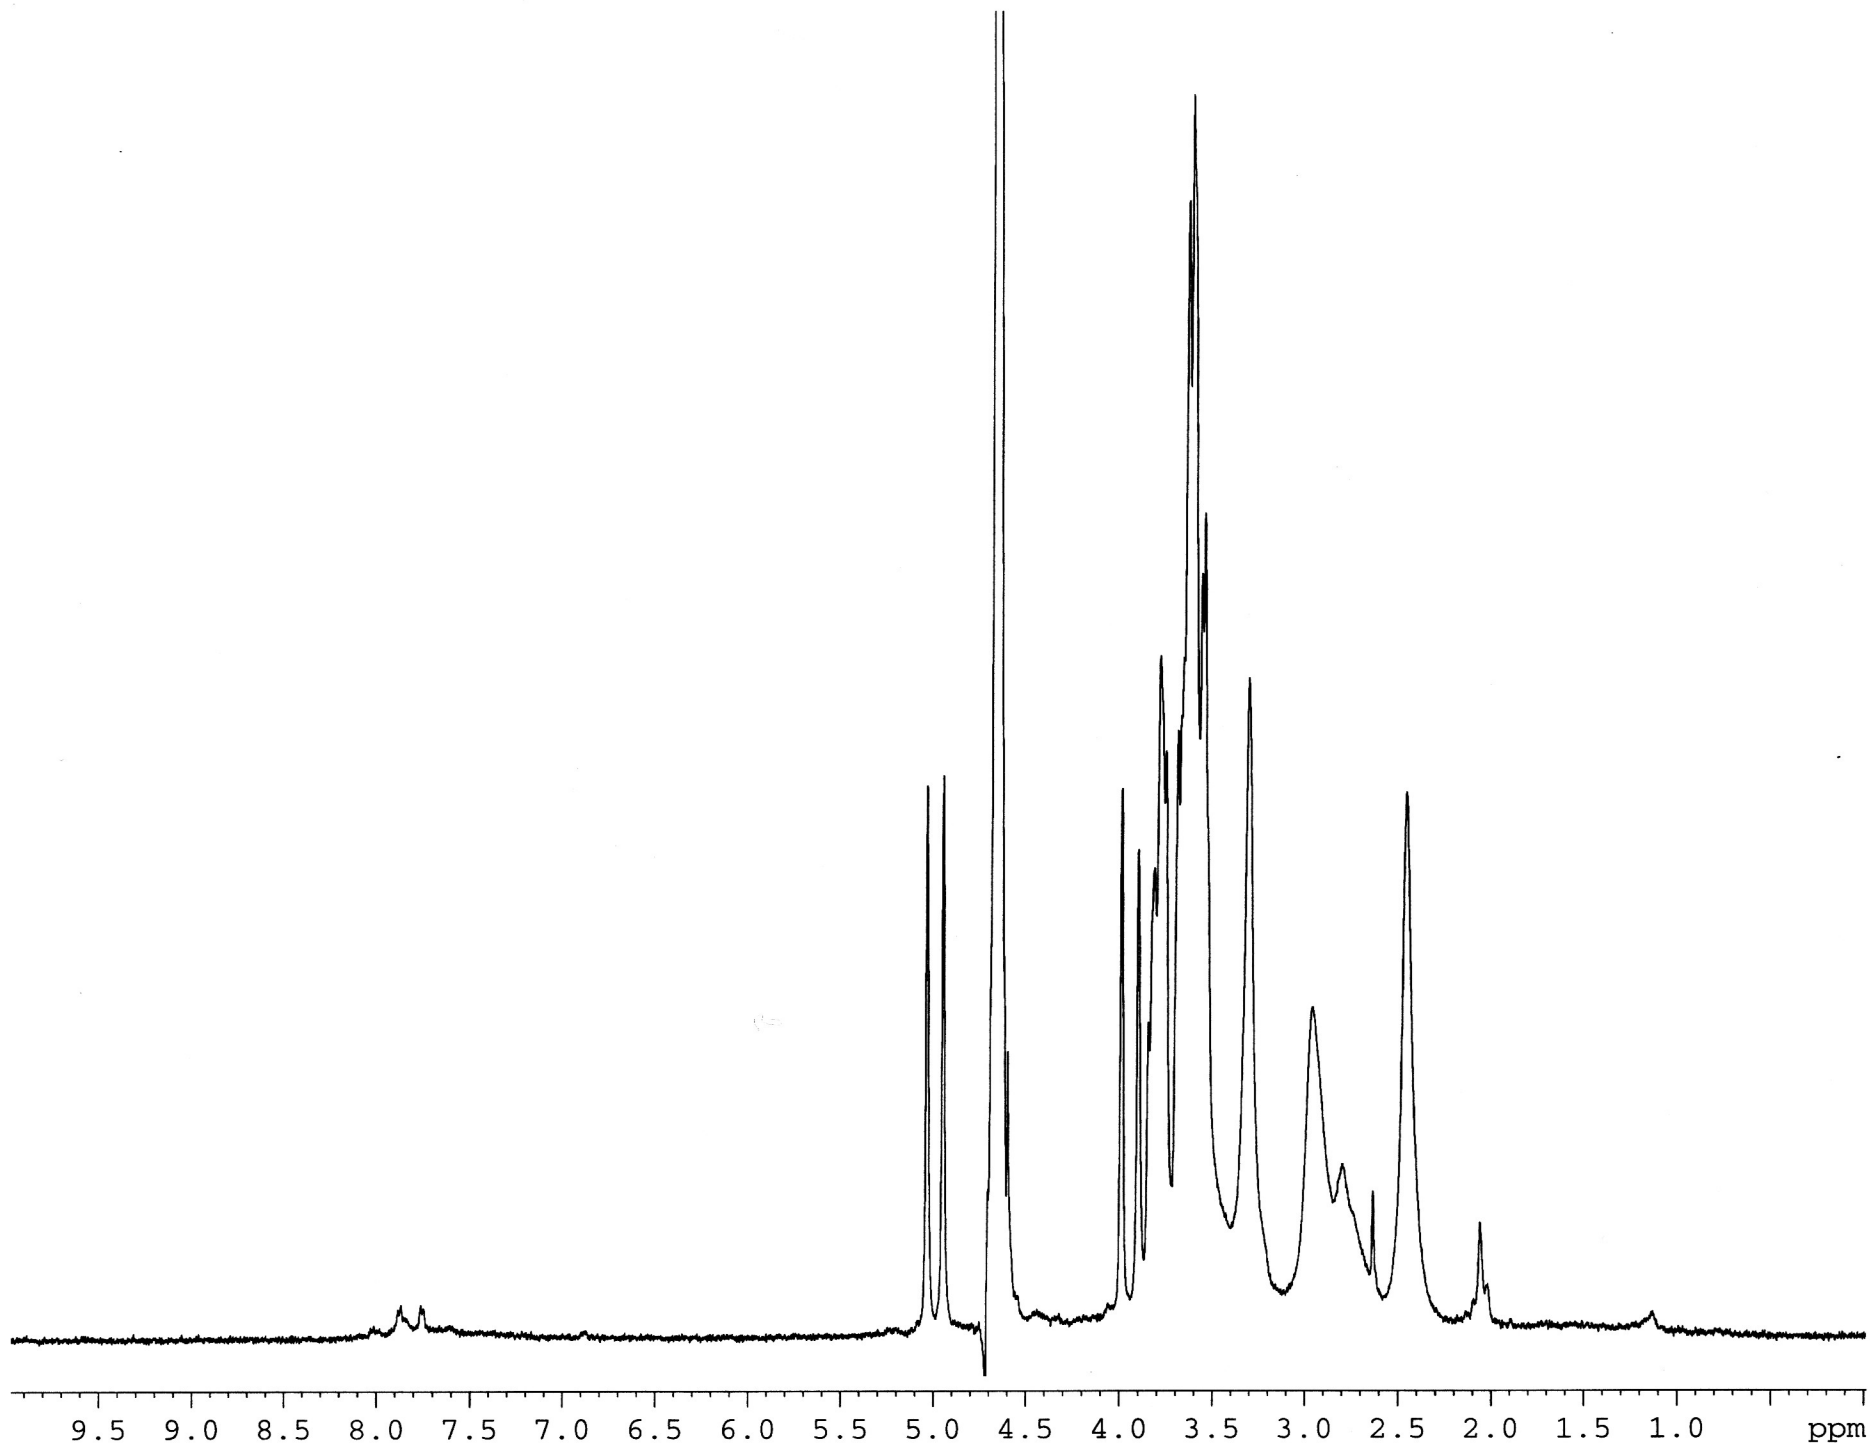

Figure S4. <sup>1</sup>H NMR spectrum (500 MHz, d<sub>6</sub>-DMSO) of 10.

Figure S5. Unsmoothed MALDI spectrum of **7**.

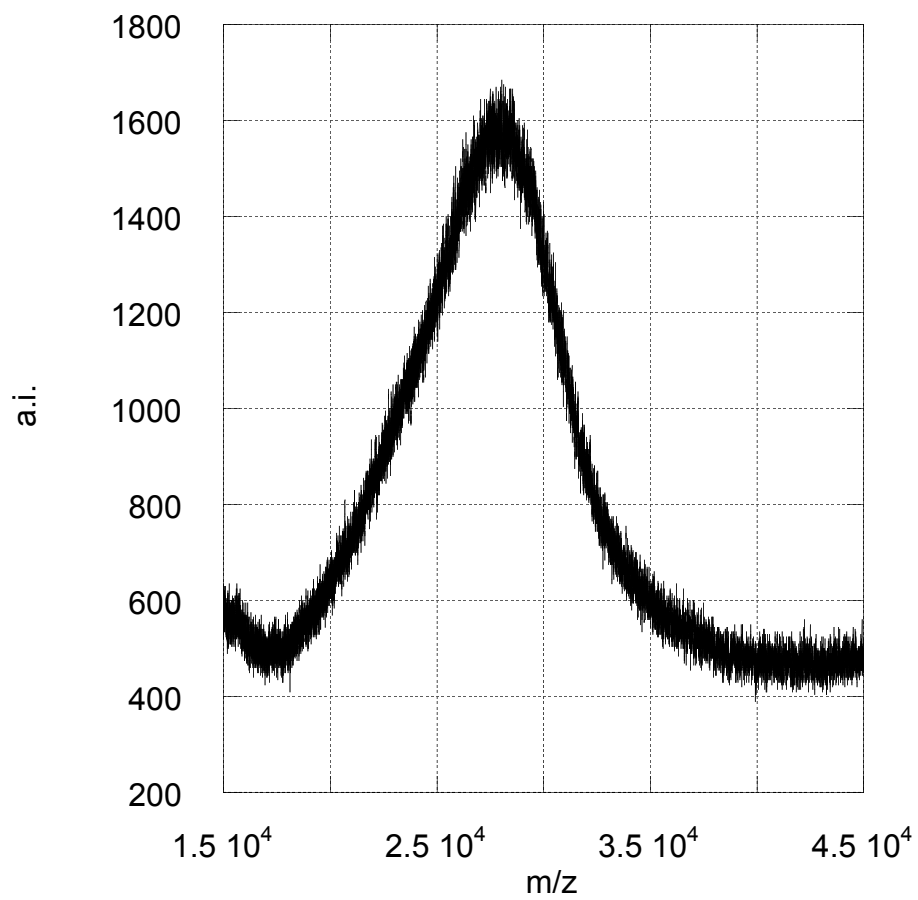

Figure S6. Unsmoothed MALDI spectrum of **8**.

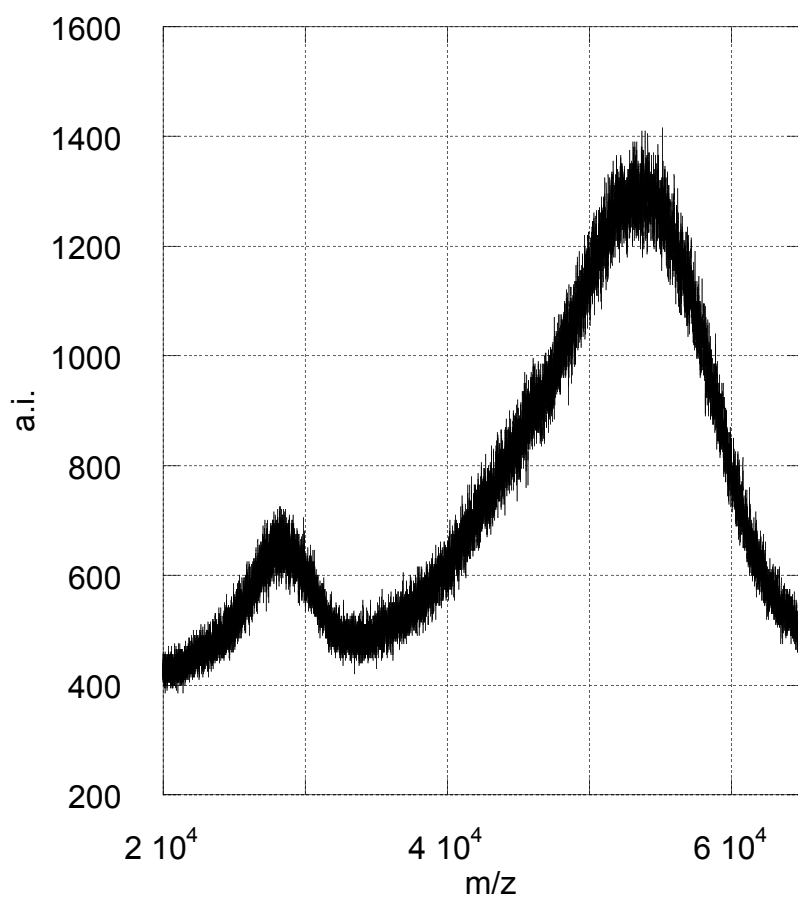

Supplement: b417789d.pdf [file b417789d.pdf]
